# Supplementary material
Source: publisher site journal article supplement (https://www.dovepress.com/article/386253)
Supplement: Supplementary file 1 [file get_supplementary_file.php]

**Supporting Information**

##### Gallium Metal−Organic Nanoparticles with Albumin-Stabilized and Loaded Graphene for Enhanced Delivery to HCT116 cells

Yuan-yuan Wu1, Wen-Hui Liao1, Zong-ling Niu1, Si-Han Zhou1, Tian-Tian Wu1, Zhe Li2, Qi-Hua Zhao1, Jing-Yuan Xu2, Ming-jin Xie1,*

*1 School of Chemical Science and Technology, Yunnan University, Kunming, People’s Republic of China.*

*2 Department of Chemical Biology and Tianjin Key Laboratory on Technologies Enabling Development of Clinical Therapeutics and Diagnostics (Theranostics), School of Pharmacy, Tianjin Medical University, Tianjin, People’s Republic of China.*

***Corresponding author：** Ming-jin Xie. Email: mjxie@ynu.edu.cn

[Figures 3](#_Toc119759799)

[**Figure S1**. Size distributions of Ga/HBrQ NPs on GO. 3](#_Toc119759800)

[**Figure S2.** Zeta potential of BSA/Ga/HBrQ NP, GO/Ga/HBrQ NP, BSA, GO and Ga(III) + HBrQ complex. 3](#_Toc119759801)

[**Figure S3**. Standard curve of Ga3+ in ultrapure water. 4](#_Toc119759802)

[**Figure S4.** Scanning electron microscope-energy scattering spectrum of BSA/Ga/HBrQ NP (a) SEM image, (b), (c), (d), (e), (f), (g) espectively Elemental distribution of Ga, C, O, N, Br, S on the surface of nano-drugs. 4](#_Toc119759803)

[**Figure S5.** Scanning electron microscope-energy scattering spectrum of GO/Ga/HBrQ NP (a) SEM image, (b), (c), (d), (e), (f) respectively Elemental distribution of Ga, C, O, N, Br on the surface of nano-drugs. 5](#_Toc119759804)

[**Figure S6**. Variation of DLS average particle size of (a) BSA/Ga/HBrQ NP and (b) GO/Ga/HBr Q NP in PBS with different pH. 5](#_Toc119759805)

[**Figure S7**. Pictures of Ga(III) + HBrQ complex dissolved in pH=7.2-7.4 PBS buffer different time points. 6](#_Toc119759806)

[**Figure S8.** Fluorescence spectra of BSA/Ga/HBrQ NP, GO/Ga/HBrQ NP and Ga(III) + HBrQ complex. 6](#_Toc119759807)

[**Figure S9.** Fluorescence lifetimes of (a) Ga(III) + HBrQ complex, (b) BSA/Ga/HBrQ NP and (c) GO/Ga/HBrQ NP in air. 7](#_Toc119759808)

[**Figure S10.** Cell experiment of Ga(III) +HBrQ complex. (a) IC50 (μM) values of compounds toward HCT116 cells and LO2 cells after 72 hours; (b) cell cycle distribution of HCT116 cells after treatment with 10μM compounds for 24 hours; (c) apoptosis ratio of HCT116 cells after treatment with 10 μM compounds for 24 hours; (d) Confocal laser scanning microscope images of Intracellular ROS detection in HCT116 cells incubated with PBS or compounds (10 μM) treatment. 7](#_Toc119759809)

Figures


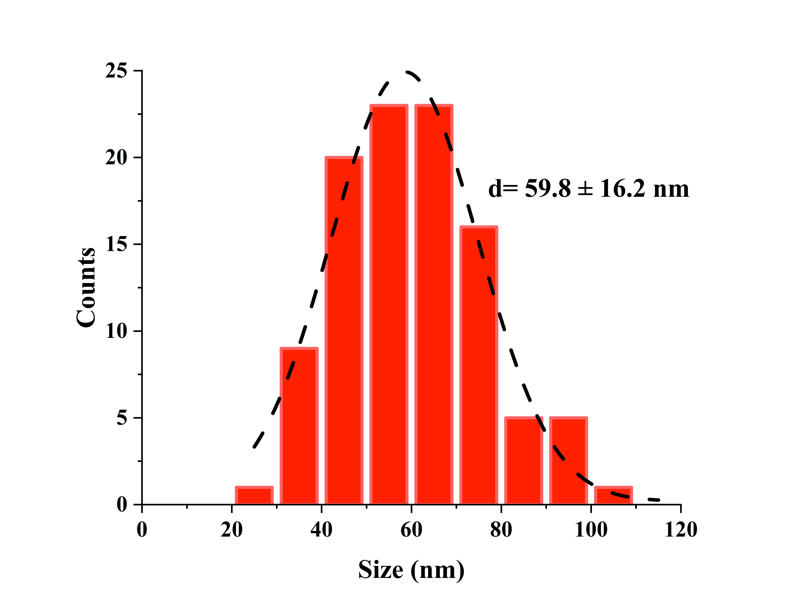


**Figure S1**. Size distributions of Ga/HBrQ NPs on GO.


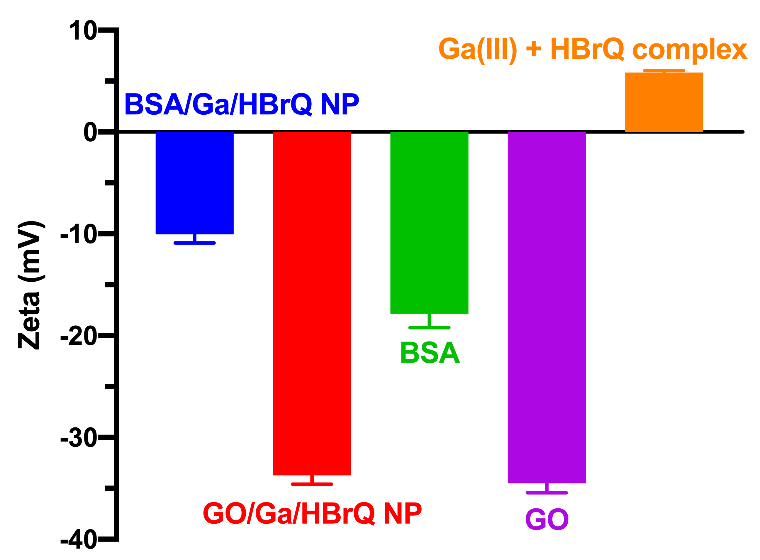


**Figure S2.** Zeta potential of BSA/Ga/HBrQ NP, GO/Ga/HBrQ NP, BSA, GO and Ga(III) + HBrQ complex.





**Figure S3**. Standard curve of Ga3+ in ultrapure water.

**
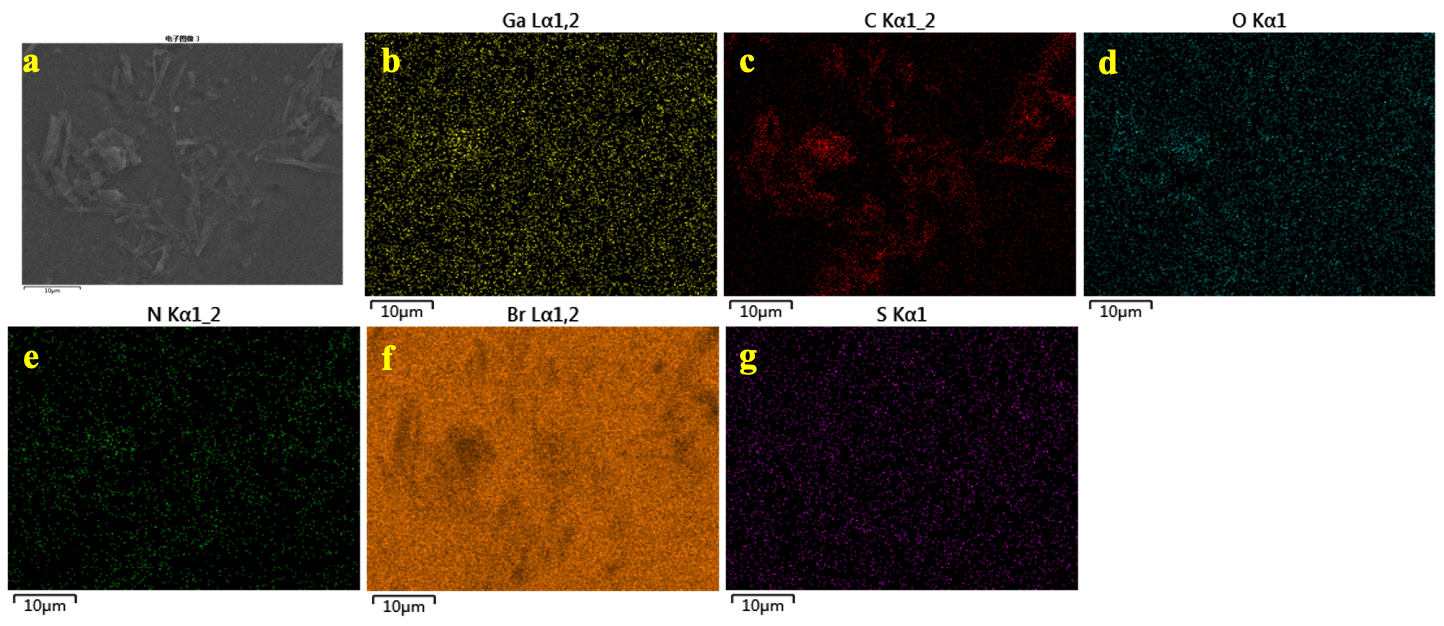
**

**Figure S4.** Scanning electron microscope-energy scattering spectrum of BSA/Ga/HBrQ NP (a) SEM image, (b), (c), (d), (e), (f), (g) espectively Elemental distribution of Ga, C, O, N, Br, S on the surface of nano-drugs.


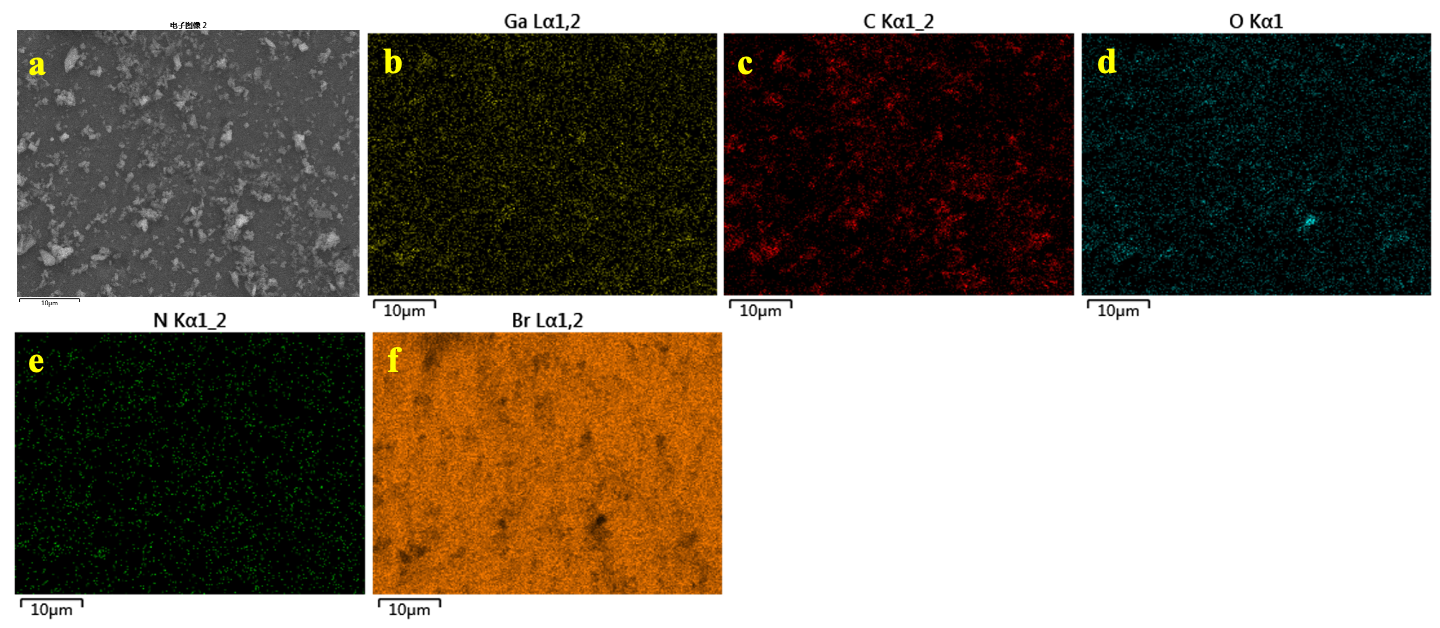


**Figure S5.** Scanning electron microscope-energy scattering spectrum of GO/Ga/HBrQ NP (a) SEM image, (b), (c), (d), (e), (f) respectively Elemental distribution of Ga, C, O, N, Br on the surface of nano-drugs.


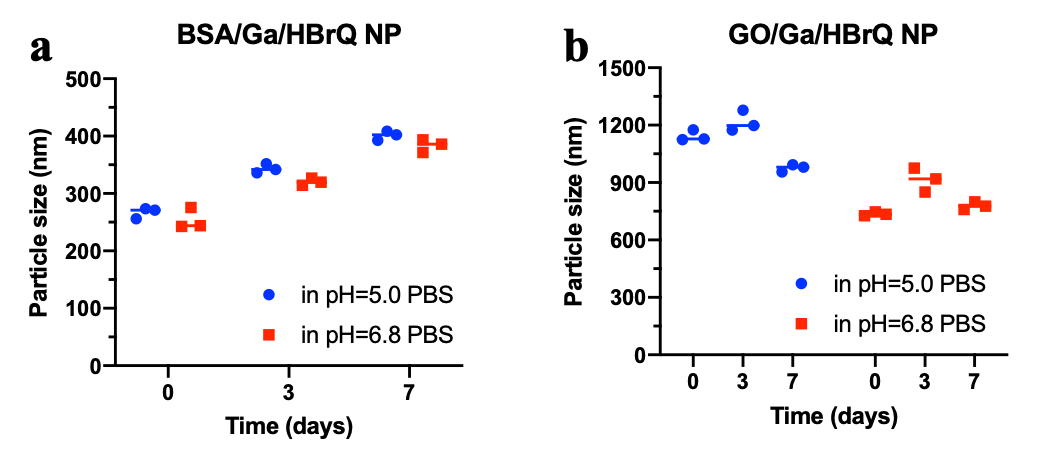


**Figure S6**. Variation of DLS average particle size of (a) BSA/Ga/HBrQ NP and (b) GO/Ga/HBr Q NP in PBS with different pH.


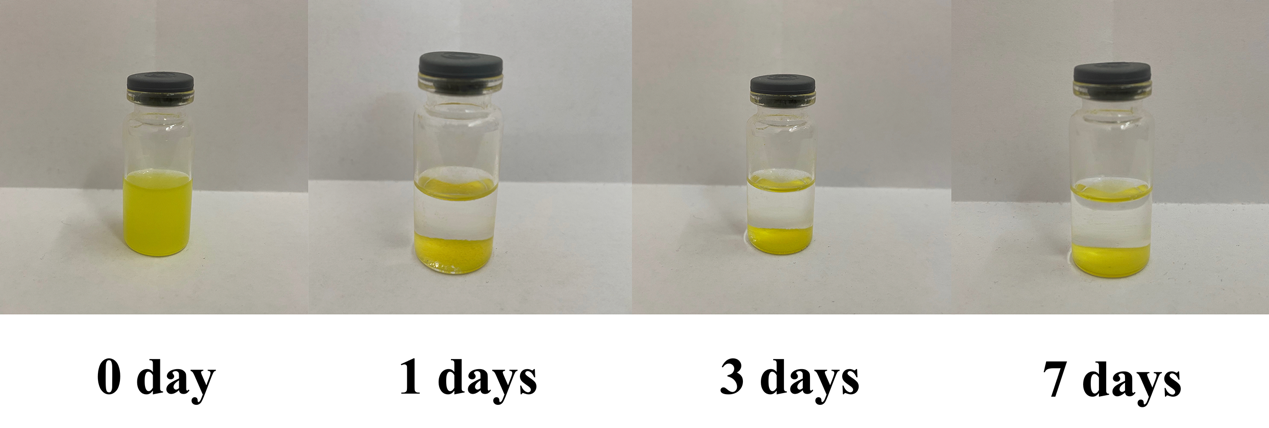


**Figure S7**. Pictures of Ga(III) + HBrQ complex dissolved in pH=7.2-7.4 PBS buffer different time points.


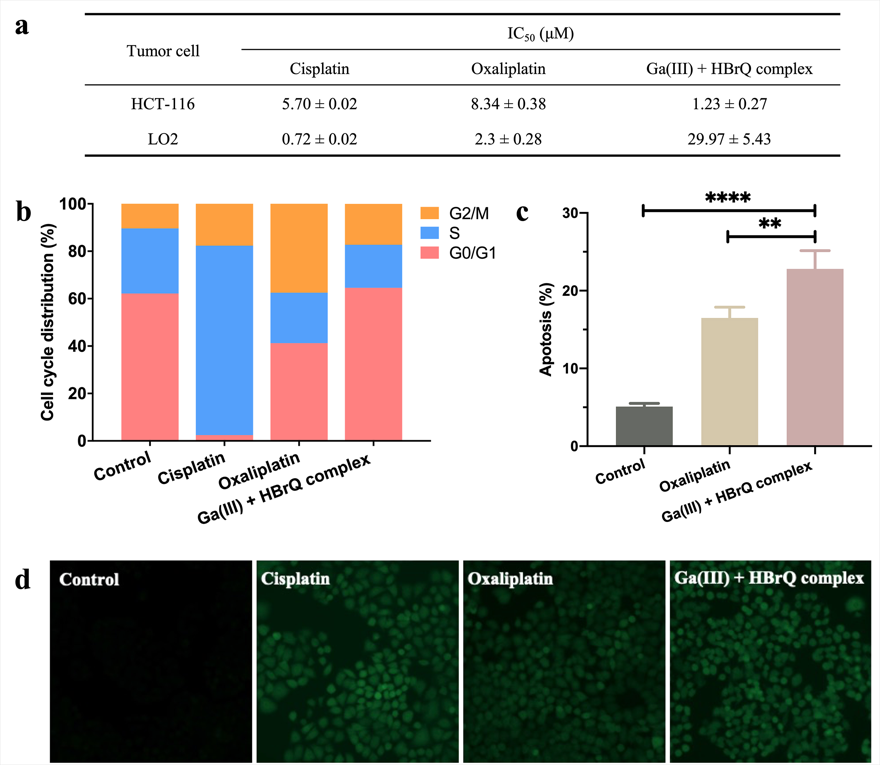


**Figure S8.** Cell experiment of Ga(III) +HBrQ complex. (a) IC50 (μM) values of compounds toward HCT116 cells and LO2 cells after 72 hours; (b) cell cycle distribution of HCT116 cells after treatment with 10μM compounds for 24 hours; (c) apoptosis ratio of HCT116 cells after treatment with 10 μM compounds for 24 hours; (d) Confocal laser scanning microscope images of Intracellular ROS detection in HCT116 cells incubated with PBS or compounds (10 μM) treatment.





**Figure S9.** Fluorescence spectra of BSA/Ga/HBrQ NP, GO/Ga/HBrQ NP and Ga(III) + HBrQ complex.

**
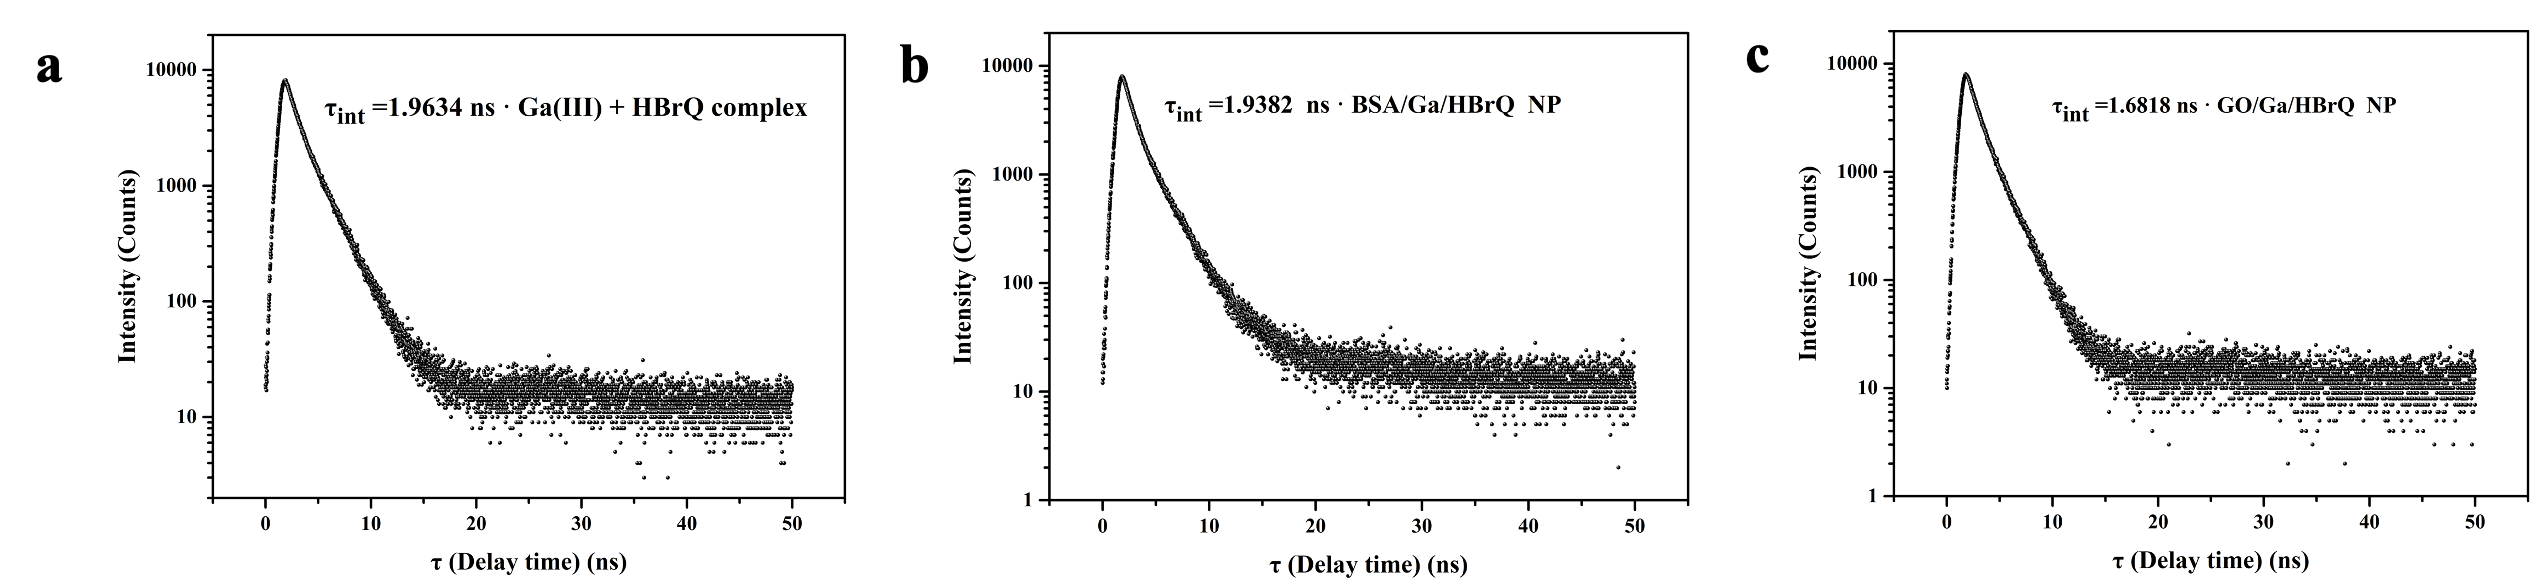
**

**Figure S10.** Fluorescence lifetimes of (a) Ga(III) + HBrQ complex, (b) BSA/Ga/HBrQ NP and (c) GO/Ga/HBrQ NP in air.
